# Supplementary material for: Pentraxin 3 Facilitates Shrimp-Allergic Responses in IgE-Activated Mast Cells
Source: Hindawi journal article supplement (doi:10.1155/2022/8953235), 2022-12-07

**A**

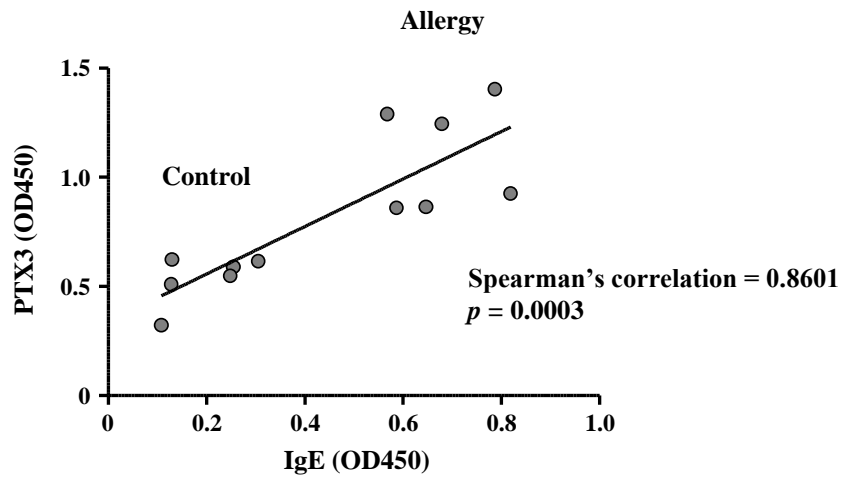

**B**

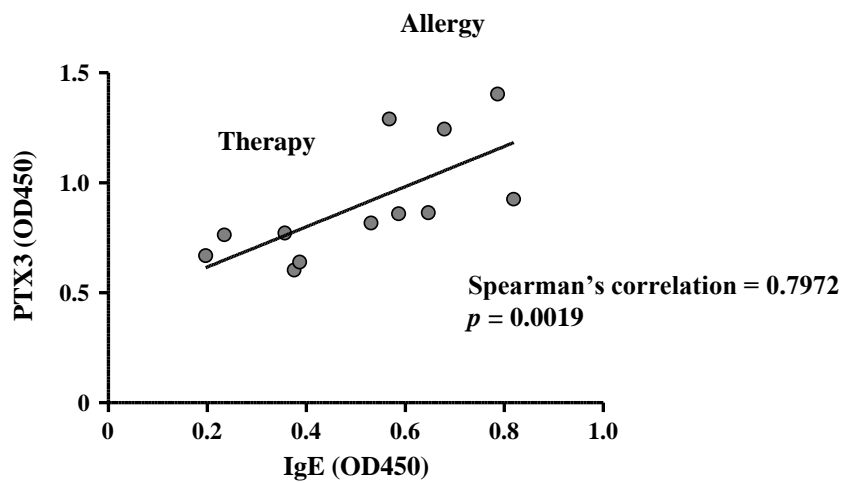

Supplement: f1 [file 8953235.f1.pdf]
